# Supplementary material for: Impedimetric graphene-based biosensor for the detection of Escherichia coli DNA
Source: Royal Society of Chemistry journal article supplement (doi:10.1039/c4ay01836b), 2014-08-07
Supplement: c4ay01836b1.pdf [file c4ay01836b1.pdf]

## Supplementary data

### Impedimetric graphene-based biosensor for the detection of *Escherichia coli*

#### DNA

Nurulasma Zainudin,<sup>a</sup> Mohd Hairul Ab. Rahim,<sup>a</sup> Mashitah Mohd Yusoff,<sup>a</sup> Ling Ling Tan<sup>b</sup> and Kwok Feng Chong<sup>\*a</sup>

<sup>a</sup> Faculty of Industrial Sciences & Technology, Universiti Malaysia Pahang, 26300 Gambang, Kuantan. Pahang. Malaysia.

<sup>b</sup> Southeast Asia Disaster Prevention Research Initiative (SEADPRI-UKM), LESTARI, Universiti Kebangsaan Malaysia, 43600 UKM Bangi, Selangor, Malaysia

\* Corresponding author: [ckfeng@ump.edu.my](mailto:ckfeng@ump.edu.my) (Tel.: +609 5492403 ; Fax: +609 5492766)

## Surface area analysis

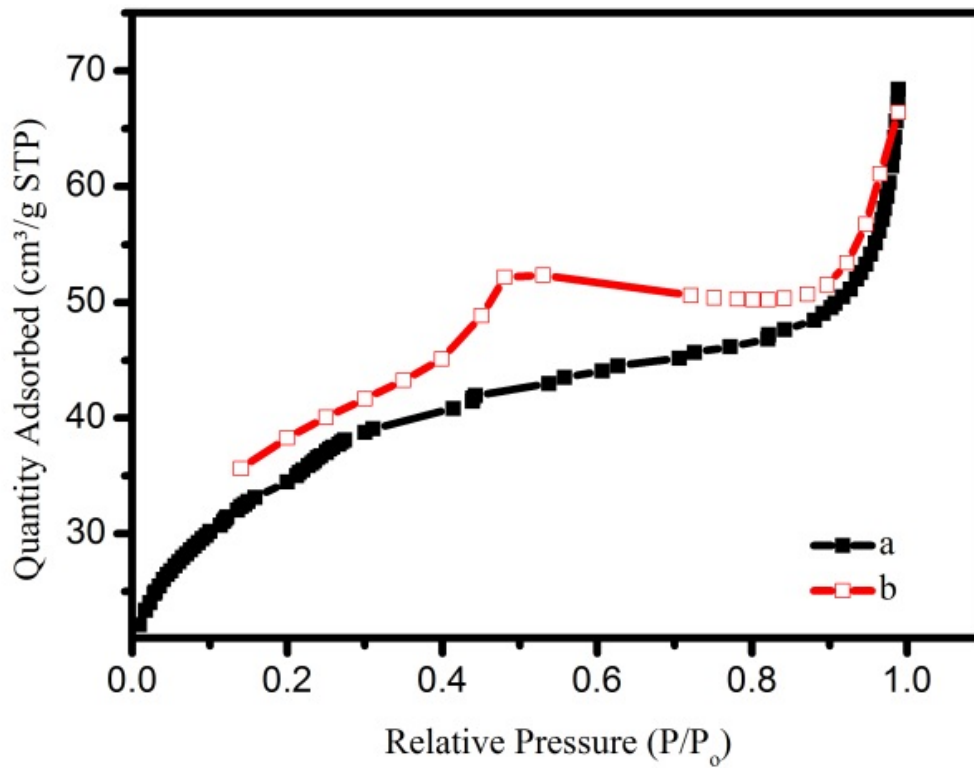

N<sub>2</sub> adsorption-desorption isotherm of rGO. (a: adsorption; b: desorption)

### cDNA conversion to number of cells

- Total molecular weight of 30bp cDNA (CGT CGC GGT ATA AGT AAT GGT ATC GGC GTT)  
= 14,695 g/mol
- Mass of 1 copy of 30bp cDNA =  $14,695 / (6.022 \times 10^{23}) = \underline{2.44 \times 10^{-20} \text{ g}}$
- 100  $\mu\text{L}$  of cDNA solution was used for the hybridization process.
- cDNA concentration of  $0.7 \times 10^{-15} \text{ M} \equiv (0.7 \times 10^{-15} \text{ M}) (100 \times 10^{-6} \text{ L}) \equiv \underline{7 \times 10^{-20} \text{ mol}}$
- Mass of cDNA concentration =  $7 \times 10^{-20} \text{ mol} \times 14,695 \text{ g/mol} = \underline{1.03 \times 10^{-15} \text{ g}}$
- Number of cDNA copies =  $(1.03 \times 10^{-15} \text{ g}) / (2.44 \times 10^{-20} \text{ g}) \approx 42213 \text{ copies}$
- Only 1 copy of eaeA gene is available in the genome of *E. coli* strain. Hence, 42213 copies of eaeA gene is available in 42213 *E. coli* cells as only one copy of the complementary sequence for 30bp of cDNA is available in each single cell of *E. coli*.
- Hence, detection limit is 42213 cells in 100  $\mu\text{L}$  solution or  **$4.22 \times 10^5 \text{ cells/mL}$** .
- Similar calculation was applied to convert linear response range from molar into cells/mL as follows:

| <i>E. coli</i> concentration (M) | cells/mL           |
|----------------------------------|--------------------|
| $1.0 \times 10^{-10}$            | $6.02 \times 10^9$ |
| $1.0 \times 10^{-11}$            | $6.02 \times 10^8$ |
| $1.0 \times 10^{-12}$            | $6.02 \times 10^7$ |
| $1.0 \times 10^{-13}$            | $6.02 \times 10^6$ |
| $1.0 \times 10^{-14}$            | $6.02 \times 10^5$ |

EIS results on selectivity

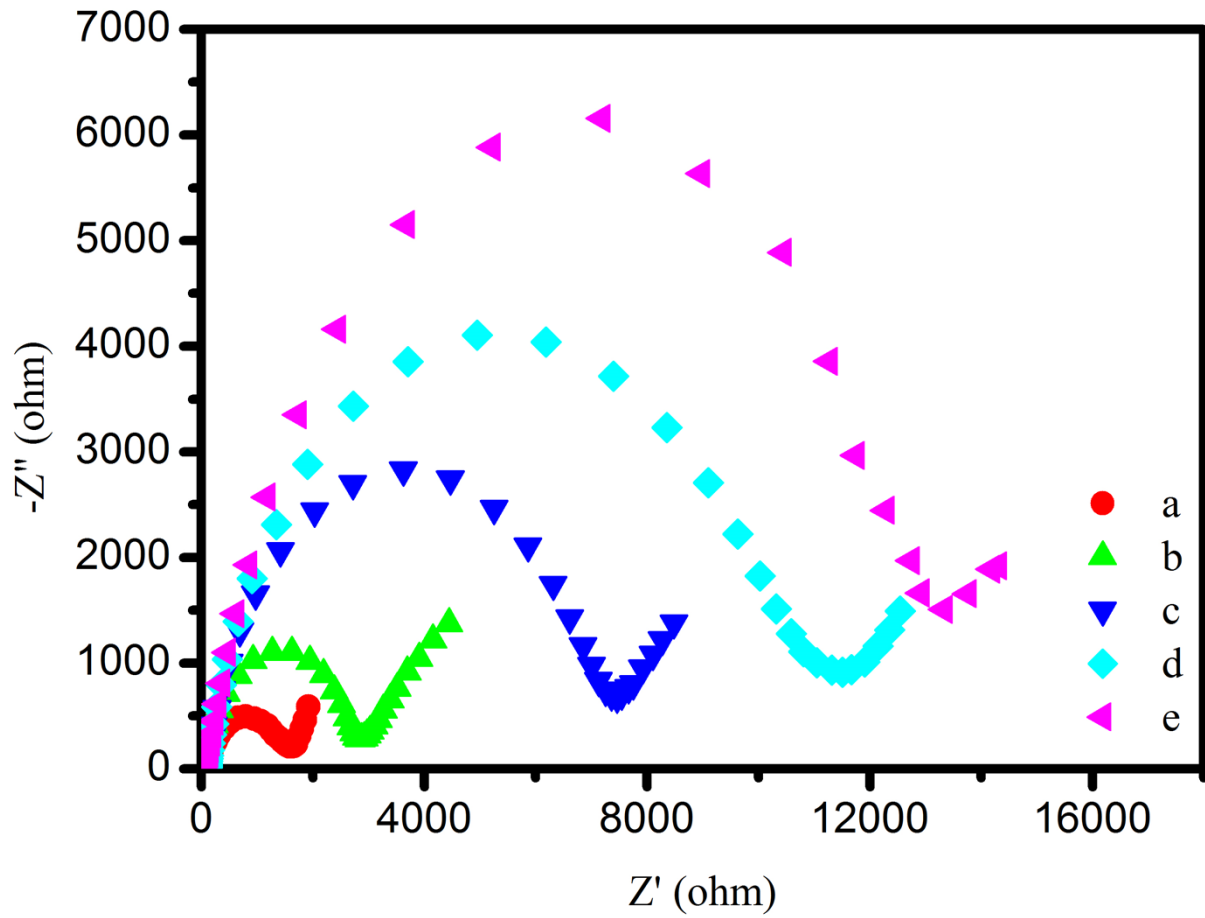

Nyquist plots of pDNA-PyBA-rGO modified hybridization processes with (a) ncDNA, (b) four-base mismatch, (c) double-base mismatch, (d) single-base mismatch, (e) cDNA. All DNA strains were tested at  $1.0 \times 10^{-10}$  M.
